# Supplementary material
Source: publisher figshare collection journal article supplement (https://tandf.figshare.com/ndownloader/files/17452730)
Supplement: Supplementary file 1 [file 17452730]

**Supplementary Table 1**: Reliability Sample: Food Store Characteristics and Healthy Food Availability Index Scores by Store Type (n=20)

| Store Type | Subtype | Number of Stores | % SNAP | % WIC | Mean HFAI-B Score | Median HFAI-B Score |
| --- | --- | --- | --- | --- | --- | --- |
| Convenience |  | 7 | 71.43 | 0.00 | 6.64 (1.00-10.50) | 8.00 (4.50-9.00) |
|  | Chain Convenience Store | 2 | 100.00 | 0.00 | 8.00 (8.00-8.00) | 8.00 (8.00-8.00) |
|  | Gas Station | 2 | 0.00 | 0.00 | 1.00 (1.00-1.00) | 1.00 (1.00-1.00) |
|  | Pharmacy | 1 | 100.00 | 0.00 | 9.00 (9.00-9.00) | 9.00 (9.00-9.00) |
|  | Discount Store | 2 | 100.00 | 0.00 | 9.75 (9.00-10.50) | 9.75 (9.38-10.14) |
| Small Grocery and Corner Store |  | 11 | 81.82 | 9.09 | 10.59 (3.50-20.50) | 10.50 (6.75-14.00) |
|  | Small Grocery | 2 | 100.00 | 50.00 | 14.50 (8.50-20.50) | 14.5 (11.50-17.50) |
|  | Corner Store | 9 | 77.78 | 0.00 | 9.72 (3.50-15.50) | 10.50 (5.50-14.00) |
| Public Market |  | 1 | 100.00 | 0.00 | 17.50 (17.50-17.50) | 17.50 (17.50-17.50) |
| Supermarket |  | 1 | 100.00 | 100.00 | 28.50 (28.50-28.50) | 28.50 (28.50-28.50) |
| Overall |  | 20 | 80.00 | 10.00 | 10.45 (1.00-28.50) | 9.00 (7.38-14.00) |

**Supplementary Table 2:** Inter-rater and Test-retest for all Items included on Survey

| **Variable** | **Inter-rater** | **Test-retest** |
| --- | --- | --- |
|  | **Pearson Correlation** | |
| HFAI-B Score | 0.99 | 0.98 |
|  | **Cohen's Kappa*** | |
| Registers | 0.68 | 0.73 |
| Aisles | 0.22 | 0.34 |
| Parking | 0.94 | 0.70 |
| Fridge | 1.00 | 1.00 |
| Fridge, staple foods | 0.72 | 0.72 |
| Freezer | 0.87 | 0.73 |
| Freezer, staple foods | 0.89 | 0.79 |
| Prepared food | 0.84 | 0.84 |
| Fruit, fresh, exact number of types | 0.76 | 0.60 |
| Fruit, fresh, range of types | 0.90 | 0.77 |
| Fruit, fresh, quality | 0.89 | 0.89 |
| Fruit, 100% juice | 1.00 | 1.00 |
| Fruit, canned | 0.84 | 0.84 |
| Fruit, canned, number of types | 0.70 | 0.63 |
| Fruit, frozen | 1.00 | 1.00 |
| Fruit, frozen, number of types | 0.82 | 0.82 |
| Vegetable, fresh, exact number of types | 0.76 | 0.67 |
| Vegetable, fresh, range of types | 0.95 | 0.86 |
| Vegetable, fresh, quality | 1.00 | 0.89 |
| Vegetable, 100% juice | 0.70 | 0.60 |
| Vegetable, canned | 1.00 | 1.00 |
| Vegetable, canned, number of types | 0.80 | 0.76 |
| Vegetable, frozen | 0.89 | 0.89 |
| Vegetable, frozen, number of types | 0.82 | 0.59 |
| Frozen meals | 1.00 | 0.79 |
| Frozen meals, healthy | 0.82 | 0.70 |
| Beans, dried | 0.90 | 0.90 |
| Beans, canned | 0.79 | 0.68 |
| Soup, canned | 0.88 | 0.88 |
| Soup, canned, low-sodium | 0.80 | 0.80 |
| Nuts | 0.47 | -0.05 |
| Nut butter | 0.84 | 0.74 |
| Meat, canned | 0.89 | 0.78 |
| Poultry, canned | 0.80 | 0.80 |
| Seafood, canned | 0.83 | 0.94 |
| Bread, loaf, any variety | 0.95 | 0.74 |
| Bread, loaf, 100% whole wheat | 0.75 | 0.63 |
| Tortilla, corn | 1.00 | 1.00 |
| Tortilla, any | 0.83 | 0.83 |
| Bagel | 0.88 | 0.63 |
| Pita | 0.73 | 0.73 |
| Roll/bun/biscuit | 0.85 | 0.85 |
| Crust/waffle/pancake | 0.79 | 0.66 |
| Pasta | 1.00 | 0.86 |
| Rice | 0.94 | 0.94 |
| Corn meal/grits | 0.79 | 0.89 |
| Flour/baking mix | 0.73 | 0.73 |
| Cereal, any | 0.83 | 0.83 |
| Cereal, more than 2 varieties of low sugar (<7g) | 0.88 | 0.88 |
| Ground beef | 1.00 | 1.00 |
| Beef, other | 0.58 | 0.56 |
| Pork | 0.95 | 0.75 |
| Deli | 0.74 | 0.74 |
| Meat, other | 0.69 | 0.90 |
| Chicken, skinless, boneless, breast | 1.00 | 1.00 |
| Chicken, quality | 1.00 | 1.00 |
| Chicken, other | 0.71 | 0.83 |
| Poultry, other | 0.78 | 0.78 |
| Fish, finned | 1.00 | 1.00 |
| Fish, quality | 1.00 | 1.00 |
| Fish, shell | 1.00 | 1.00 |
| Eggs | 0.82 | 0.58 |
| Meat alternative | 0.72 | 0.72 |
| Milk, any fat content | 0.93 | 0.93 |
| Milk, low fat (skim or 1%) | 1.00 | 0.79 |
| Butter | 0.79 | 0.79 |
| Margarine | 0.75 | 0.75 |
| Cheese, hard | 0.93 | 0.80 |
| Cheese, soft | 0.63 | 0.74 |
| Cheese, vegan | 1.00 | 1.00 |
| Milk, other | 1.00 | 1.00 |
| Milk, plant | 0.79 | 0.79 |
| Yogurt/sour cream | 0.74 | 0.74 |
| Infant formula | 0.84 | 0.84 |
| **Mean** | **0.83** | **0.80** |

* According to guidelines from Landis and Koch, a Cohen’s Kappa score of 0.81-1.00 is almost perfect; 0.61-0.80 is substantial; 0.41-0.60 is moderate; 0.21-0.40 is fair; 0-.20 is slight and <0 is poor.
